# Supplementary material
Source: PubMed Central journal article supplement (PMC164653)
Supplement: pnas_1332628100_8.pdf [file pnas_1332628100_8.pdf]

Table 1.

| Parameter value           | Meaning                                                                |
|---------------------------|------------------------------------------------------------------------|
| $m = 60$                  | For plasmids containing ColE1 origin of replication*                   |
| $\alpha = 11$             | Degree of transcriptional activation <sup>†</sup>                      |
| $c_1 = 0.05$              | Equilibrium constant for cI dimerization <sup>†</sup>                  |
| $c_2 = 0.33$              | Equilibrium constant for cI-OR1 reaction <sup>†</sup>                  |
| $\sigma_1 = 2.0$          | Binding affinity for cI dimer to OR2 relative to OR1 <sup>†</sup>      |
| $\sigma_2 = 0.08$         | Binding affinity for cI dimer to OR3 relative to OR1 <sup>†</sup>      |
| $\beta = 100.0$           | Basal production rate of 100 proteins in one cell-division time        |
| $\eta = 0.01$             | Efficiency of GFP monomer production versus that of cI                 |
| $\gamma_g = 10.0$         | GFP degradation of 10 monomers in one cell-division time               |
| $b_0 = 4.0$               | Constant in relationship of GFP number to fluorescence                 |
| $\gamma_x = 500 - 15000$  | Number of cI monomers destabilized per cell-division time              |
| $c(\gamma_x) = 2.0 - 5.7$ | Proportionality constant relating number of GFP number to fluorescence |

\* Lutz, R. & Bujard, H. (1997) *Nucleic Acids Res.* **25**, 1203–1210.

<sup>†</sup> Ptashne, M. (1992) *A Genetic Switch: Phage  $\lambda$  and Higher Organisms* (Cell Press & Blackwell Scientific Publications, Cambridge, MA), 2nd Ed.
