# Supplementary material
Source: PubMed Central journal article supplement (PMC164653)

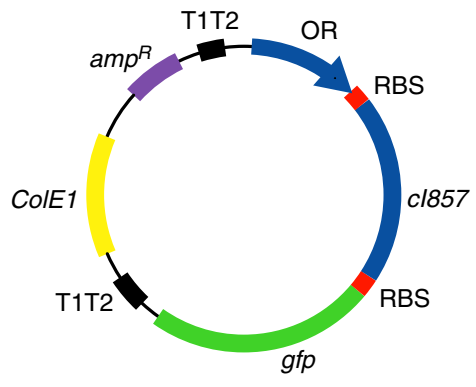

Supplement: pnas_1332628100_2.pdf [file pnas_1332628100_2.pdf]

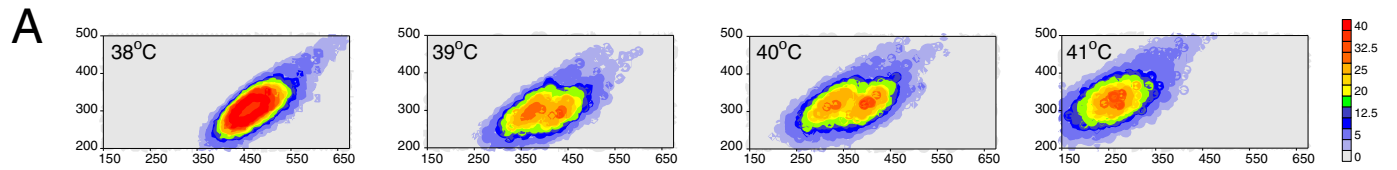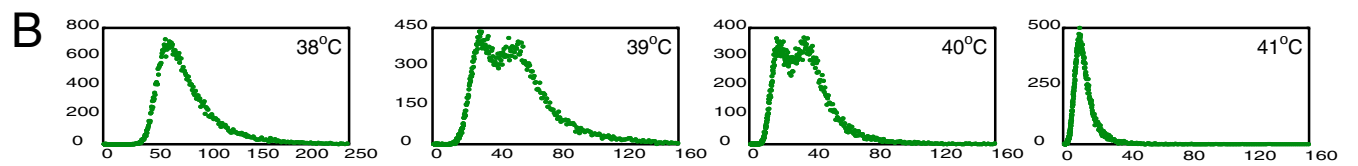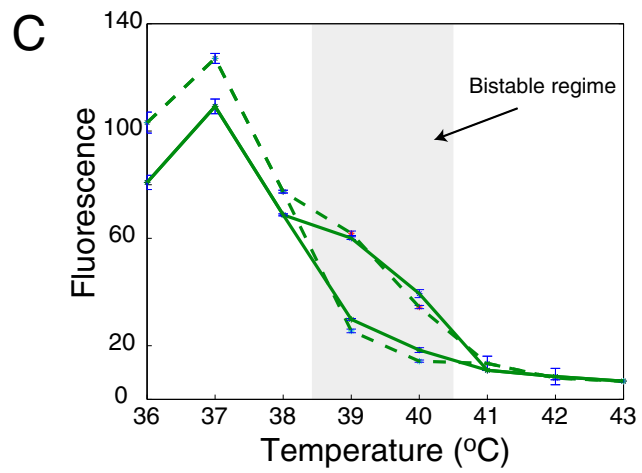

Supplement: pnas_1332628100_4.pdf [file pnas_1332628100_4.pdf]

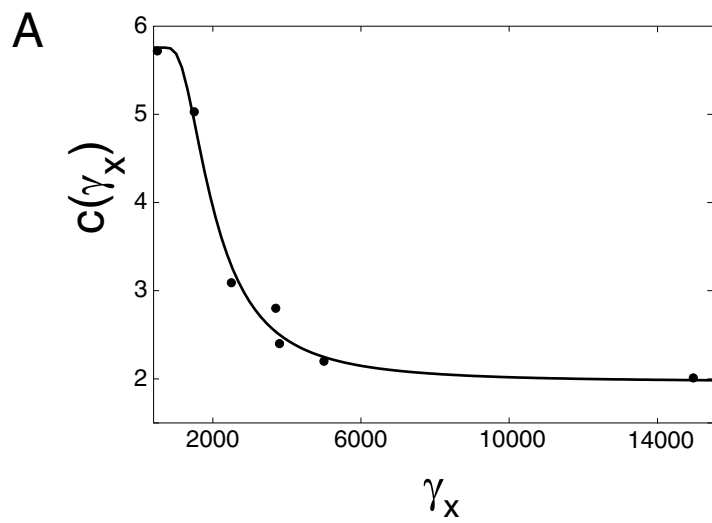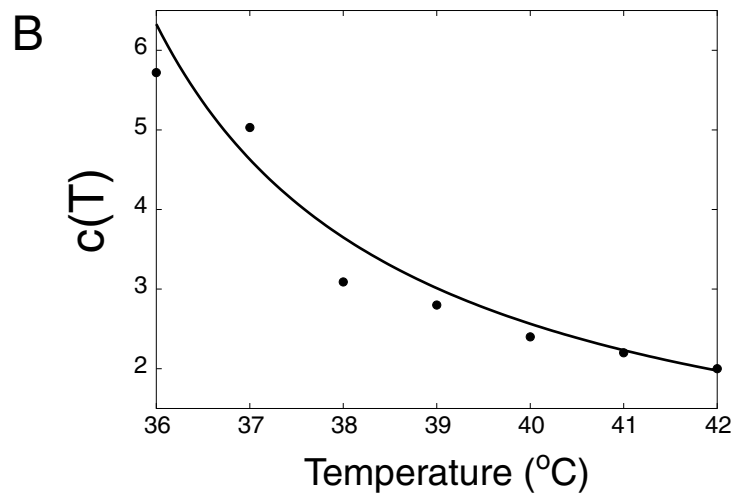

Supplement: pnas_1332628100_7.pdf [file pnas_1332628100_7.pdf]
